# Supplementary material for: Reduced QSOX1 enhances radioresistance in nasopharyngeal carcinoma
Source: PubMed Central journal article supplement (PMC5790459; doi:10.18632/oncotarget.23227), 2017-12-14
Supplement: oncotarget-09-3230-s001.pdf [file oncotarget-09-3230-s001.pdf]

## Reduced QSOX1 enhances radioresistance in nasopharyngeal carcinoma

### SUPPLEMENTARY MATERIALS

**Supplementary Table 1: Comparison of clinicopathological parameters between the two groups of NPC patients**

| Classification  |                  | Radioresistant group ( <i>n</i> = 28) | Radiosensitive group ( <i>n</i> = 32) | * <i>p</i> |
|-----------------|------------------|---------------------------------------|---------------------------------------|------------|
| Age             | <50              | 17                                    | 20                                    | >0.05      |
|                 | ≥50              | 11                                    | 12                                    |            |
| Gender          | Male             | 22                                    | 25                                    | >0.05      |
|                 | Female           | 6                                     | 7                                     |            |
| Pathologic type | Differentiated   | 5                                     | 6                                     | >0.05      |
|                 | Undifferentiated | 23                                    | 26                                    |            |
| T stage         | T1–T2            | 12                                    | 9                                     | >0.05      |
|                 | T3–T4            | 16                                    | 23                                    |            |
| N stage         | N0–N1            | 15                                    | 12                                    | >0.05      |
|                 | N2–N3            | 13                                    | 20                                    |            |
| Clinical stage  | I–II             | 8                                     | 5                                     | >0.05      |
|                 | III–IV           | 20                                    | 27                                    |            |
| GTVnx (Gy)      |                  | 71.18 ± 0.92                          | 71.21 ± 1.01                          | >0.05      |
| GTVnd (Gy)      |                  | 68.33 ± 2.06                          | 68.45 ± 2.42                          | >0.05      |
| CTV1 (Gy)       |                  | 60.50 ± 0.88                          | 60.88 ± 1.01                          | >0.05      |
| CTV2 (Gy)       |                  | 54.45 ± 0.79                          | 54.62 ± 0.87                          | >0.05      |

TNM staging was performed according with the 7th edition of the American Joint Committee on Cancer/Union for International Cancer Control (AJCC/ UICC) staging system. GTVnx = the gross tumor volume of nasopharynx, GTVnd = cervical lymph node tumor volume, CTV = clinical target volume. The differences between the two groups were not statistically significant.
